# Supplementary material
Source: PubMed Central journal article supplement (PMC1187988)
Supplement: pnas_0504588102_3.pdf [file pnas_0504588102_3.pdf]

**Table 2. Structural parameters for di-C<sub>18</sub>-PC (adsorbed and grafted samples) at various temperatures used in Eq. 1.**

|                                                 | <i>Adsorbed sample</i> |                 | <i>Grafted sample</i> |
|-------------------------------------------------|------------------------|-----------------|-----------------------|
| $T, ^\circ\text{C}$                             | 25.0                   | 56.1            | 57                    |
| $\rho_{\text{H}_2\text{O}}, e^-/\text{\AA}^3$   | 0.344                  | 0.344           | 0.344                 |
| $D_{h,2}, \text{nm}$                            | $2.35\pm 0.05$         | $2.41\pm 0.02$  | $2.1\pm 0.1$          |
| $\rho_{h,2}, e^-/\text{\AA}^3$                  | $0.11\pm 0.02$         | $0.1\pm 0.1$    | $0.13\pm 0.02$        |
| $\sigma_{h,2}, \text{nm}$                       | $0.6\pm 0.1$           | $0.2\pm 0.1$    | $0.4\pm 0.1$          |
| $\rho_{\text{CH}_2}, e^-/\text{\AA}^3$          | $0.32\pm 0.02$         | $0.29\pm 0.02$  | $0.32\pm 0.01$        |
| $\rho_{\text{CH}_3}, e^-/\text{\AA}^3$          | $-0.14\pm 0.05$        | $-0.14\pm 0.05$ | $-0.13\pm 0.03$       |
| $\sigma_{\text{CH}_3}, \text{nm}$               | $0.17\pm 0.03$         | $0.10\pm 0.05$  | $0.15\pm 0.05$        |
| $\rho_{\text{CH}_2}, e^-/\text{\AA}^3$          | $0.32\pm 0.02$         | $0.29\pm 0.02$  | $0.32\pm 0.01$        |
| $D_{h,2}, \text{nm}$                            | $2.35\pm 0.05$         | $2.41\pm 0.02$  | $2.1\pm 0.1$          |
| $\rho_{h,2}, e^-/\text{\AA}^3$                  | $0.11\pm 0.02$         | $0.1\pm 0.1$    | $0.13\pm 0.02$        |
| $\sigma_{h,2}, \text{nm}$                       | $0.6\pm 0.1$           | $0.2\pm 0.1$    | $0.4\pm 0.1$          |
| $D_{\text{H}_2\text{O},2}, \text{nm}$           | $1.9\pm 0.1$           | $2.4\pm 0.4$    | $2.1\pm 0.1$          |
| $\rho_{\text{H}_2\text{O},2}, e^-/\text{\AA}^3$ | 0.344                  | 0.344           | 0.344                 |
| $D_{h,1}, \text{nm}$                            | $2.31\pm 0.02$         | $2.41\pm 0.02$  | $1.55\pm 0.05$        |
| $\rho_{h,1}, e^-/\text{\AA}^3$                  | $0.13\pm 0.02$         | $0.12\pm 0.01$  | $0.055\pm 0.005$      |
| $\sigma_{h,1}, \text{nm}$                       | $0.39\pm 0.03$         | $0.41\pm 0.03$  | $0.40\pm 0.01$        |
| $\rho_{\text{CH}_2}, e^-/\text{\AA}^3$          | $0.29\pm 0.02$         | $0.27\pm 0.02$  | $0.32\pm 0.02$        |
| $\rho_{\text{CH}_3}, e^-/\text{\AA}^3$          | $-0.15\pm 0.01$        | $-0.14\pm 0.01$ | $-0.14\pm 0.02$       |
| $\sigma_{\text{CH}_3}, \text{nm}$               | $0.14\pm 0.02$         | $0.25\pm 0.05$  | $0.36\pm 0.05$        |
| $\rho_{\text{CH}_2}, e^-/\text{\AA}^3$          | $0.32\pm 0.02$         | $0.29\pm 0.02$  | $0.32\pm 0.01$        |
| $D_{h,1}, \text{nm}$                            | $2.31\pm 0.02$         | $2.41\pm 0.02$  | $1.55\pm 0.05$        |
| $\rho_{h,1}, e^-/\text{\AA}^3$                  | $0.13\pm 0.02$         | $0.12\pm 0.01$  | $0.055\pm 0.005$      |
| $\sigma_{h,1}, \text{nm}$                       | $0.39\pm 0.03$         | $0.41\pm 0.03$  | $0.40\pm 0.01$        |
| $D_{\text{H}_2\text{O},1}, \text{nm}$           | $0.33\pm 0.05$         | $0.33\pm 0.05$  |                       |
| $\rho_{\text{H}_2\text{O},1}, e^-/\text{\AA}^3$ | 0.344                  | 0.344           | 0.344                 |
| $D_{\text{sil}}, \text{nm}$                     |                        |                 | $2.6\pm 0.1$          |
| $\rho_{\text{sil}}, e^-/\text{\AA}^3$           |                        |                 | $0.02\pm 0.01$        |
| $\sigma_{\text{sil}}, \text{nm}$                |                        |                 | $0.25\pm 0.02$        |
| $D_{\text{SiO}_2}, \text{nm}$                   | $2.3\pm 0.2$           | $2.3\pm 0.2$    | $1.5\pm 0.2$          |
| $\rho_{\text{SiO}_2}, e^-/\text{\AA}^3$         | $0.34\pm 0.02$         | $0.34\pm 0.02$  | $0.27\pm 0.02$        |
| $\sigma_{\text{SiO}_2}, \text{nm}$              | $0.13\pm 0.02$         | $0.27\pm 0.02$  | $0.25\pm 0.02$        |
| $\rho_{\text{Si}}, e^-/\text{\AA}^3$            | 0.376                  | 0.376           | 0.376                 |

$D$ , box thickness;  $\rho$ , electron density amplitude;  $\sigma$ , standard deviation of the box interface position (averaged over the coherence length  $2\lambda/\theta \cdot \delta\theta$ ). Data are obtained by specular reflectivity experiments using the 1G-hybrid box model (Eq. 1) in which some boxes lack  $D$  or  $\sigma$ . They are presented from top to bottom: bulk water 1, lipid layer 2 (floating bilayer), water layer 2 (intermediate), lipid layer 1 (adsorbed or grafted), water layer 1 (hydration), and substrate. h= head, sil=silane, Si=silicon.
