# Supplementary material
Source: PubMed Central journal article supplement (PMC1187988)
Supplement: pnas_0504588102_4.pdf [file pnas_0504588102_4.pdf]

**Table 3. Parameters for di-C<sub>17</sub>-PC grafted samples, obtained by off-specular experiments at various temperatures.**

| $T$ , | $F_1$ ,            | $F_2$ ,            | $F_3$ ,            | $F_4$ ,            | $D$ ,          | $\gamma$ ,                | $\kappa$ ,           |
|-------|--------------------|--------------------|--------------------|--------------------|----------------|---------------------------|----------------------|
| °C    | $e^{-}/\text{Å}^2$ | $e^{-}/\text{Å}^2$ | $e^{-}/\text{Å}^2$ | $e^{-}/\text{Å}^2$ | nm             | $10^{-4} \text{ Jm}^{-2}$ | $10^{-19} \text{ J}$ |
| 39    | $-1.8 \pm 0.15$    | $-1.22 \pm 0.12$   | $0.7 \pm 0.12$     | $-1.22 \pm 0.12$   | $6.5 \pm 0.25$ | $5 \pm 3$                 | $10 \pm 4$           |
| 44    | $-2.3 \pm 0.2$     | $-1.3 \pm 0.2$     | $0.9 \pm 0.15$     | $-1.42 \pm 0.14$   | $6.5 \pm 0.25$ | $5 \pm 2.5$               | $2 \pm 0.4$          |
| 49    | $-2.3 \pm 0.1$     | $-1.38 \pm 0.14$   | $0.7 \pm 0.15$     | $-1.39 \pm 0.12$   | $6.4 \pm 0.25$ | $4 \pm 0.5$               | $1.6 \pm 0.5$        |

Fourier coefficients ( $F_h$ ) and pseudo-period  $D$  obtained from Eq. 8; surface tension ( $\gamma$ ), and bending modulus ( $\kappa$ ).

Error bars are incertitudes from the fits.  $F_0 = 0$  for all samples.
