# Supplementary material
Source: PubMed Central journal article supplement (PMC1187988)
Supplement: pnas_0504588102_5.pdf [file pnas_0504588102_5.pdf]

**Table 4. Parameters for di-C<sub>18</sub>-PC grafted samples.**

| $T$ , | $F_1$ ,            | $F_2$ ,            | $F_3$ ,            | $F_4$ ,            | $D$ ,     | $\gamma$ ,                | $\kappa$ ,           |
|-------|--------------------|--------------------|--------------------|--------------------|-----------|---------------------------|----------------------|
| °C    | $e^-/\text{\AA}^2$ | $e^-/\text{\AA}^2$ | $e^-/\text{\AA}^2$ | $e^-/\text{\AA}^2$ | nm        | $10^{-4} \text{ Jm}^{-2}$ | $10^{-19} \text{ J}$ |
| 48.0  | -1.8±0.15          | -1.1±0.15          | 0.6±0.2            | -1±0.15            | 6.7±0.3   | 4±2                       | 11±2                 |
| 48.4  | -1.5±0.15          | -1.25±0.15         | 0.8±0.18           | -1.1±0.15          | 6.9±0.3   | 5±1                       | 10±3                 |
| 51.1  | -1.5±0.15          | -1.1±0.15          | 0.7±0.18           | -1.1±0.15          | 6.9±0.3   | 4±2.4                     | 11±3                 |
| 51.5  | -2.4±0.2           | -1.4±0.15          | 0.9±0.25           | -1.6±0.2           | 6.75±0.25 | 4±1                       | 1.2±0.4              |
| 52.8  | -2.6±0.2           | -1.0±0.1           | 0.9±0.3            | -1.45±0.25         | 6.75±0.25 | 5±0.5                     | 0.8±0.2              |
| 54.8  | -2.5±0.2           | -1.0±0.15          | 0.6±0.35           | -1.5±0.2           | 6.45±0.25 | 3.5±1                     | 2±0.6                |
| 56.1  | -2.3±0.15          | -1.1±0.15          | 0.8±0.3            | -1.4±0.28          | 6.7±0.25  | 5±3                       | 1.2±0.2              |
| 57.0  | -2.4±0.3           | -1.18±0.18         | 0.8±0.2            | -1.3±0.3           | 6.7±0.27  | 5.5±1                     | 0.8±0.04             |
