# Supplementary material
Source: PubMed Central journal article supplement (PMC1187988)
Supplement: pnas_0504588102_6.pdf [file pnas_0504588102_6.pdf]

## Supporting Text

### Calculation of the Scattering Cross-Section

**Form Factor.** For specular data, we calculate the form factor  $\tilde{\rho}(q_z) = \left| \int \rho(z) e^{iq_z z} dz \right|^2$  using the 1G-hybrid model:

$$\begin{aligned} \tilde{\rho}(q_z) &= \frac{2(\rho_{CH_2} - \rho_{H_2O}) \sin(q_z z_h) \cos(q_z \sigma_h)}{q_z (1 - (2/\pi q_z \sigma_h)^2)} \\ &+ 2\sqrt{2\pi} \rho_h \sigma_h \cos(q_z z_h) \exp(-1/2 q_z^2 \sigma_h^2) \\ &+ 2\sqrt{2\pi} \rho_{CH_3} \sigma_{CH_3} \cos(q_z z_{CH_3}) \exp(-1/2 q_z^2 \sigma_{CH_3}^2). \end{aligned} \quad [7]$$

Note that  $\sigma_h$  and  $\sigma_{CH_3}$  lump contributions not only from rms thermal fluctuations but also from the width of the transition between two neighboring regions.

For diffuse scattering data, we use the Fourier expansion

$$\tilde{\rho}(q_z) = \int_{D/2}^{D/2} [\rho(z) - \rho_w] e^{-iq_z z} dz = \sum_{h=-h_{\max}}^{h_{\max}} F_h \frac{\sin(qD/2 - \pi h)}{(qD/2 - \pi h)}. \quad [8]$$

**Height:Height Correlation Function.** To calculate the height:height correlation function  $\langle z(\mathbf{0})z(\mathbf{r}_{\parallel}) \rangle$ , we take the Fourier transform of the Helfrich thermal fluctuation spectrum  $\langle z(q_{\parallel})z(q_{\parallel}) \rangle$  (see main text) and obtain

$$\langle z(\mathbf{0})z(\mathbf{r}_{\parallel}) \rangle = \frac{k_B T}{2\pi\sqrt{\Delta}} \times [K_0(q_1 r_{\parallel}) - K_0(q_2 r_{\parallel})], \quad [9]$$

where  $\Delta = \gamma^2 - 4U''\kappa$ .  $K_0$  is the modified Bessel function of the second kind of order 0. For real arguments,

$$K_0(x)_{x \rightarrow 0} \approx \text{Log} 2 - \gamma_E \text{Log}(x) \quad [10]$$

where  $\gamma_E$  is the Euler constant and  $\lim_{x \rightarrow \infty} K_0(x) = 0$ .

If  $\Delta > 0$ ,  $q_1$  and  $q_2$  are real:

$$\begin{aligned} q_1 &= \sqrt{(\gamma - \sqrt{\Delta})/2\kappa} \\ q_2 &= \sqrt{(\gamma + \sqrt{\Delta})/2\kappa}. \end{aligned}$$

[11]

If  $\Delta < 0$ , they become complex:

$$\begin{aligned} q_1 &= \sqrt{(\gamma - i\sqrt{-\Delta})/2\kappa} \\ q_2 &= \sqrt{(\gamma + i\sqrt{-\Delta})/2\kappa}. \end{aligned}$$

[12]

For  $|z| < 2$ , following Abramovitz and Stegun (1), we use

$$K_0(z) = - \left[ \log\left(\frac{z}{2}\right) + \gamma_E \right] I_0(z) + z_d + \frac{3}{8}z_d^2 + \frac{11}{216}z_d^3 + \frac{25}{6912}z_d^4 + \dots$$

[13]

with  $z_d = 1/4z^2$  and  $I_0(z) = \sum_{k=0}^{\infty} z_d^k / (k!)^2$ , where  $I_0$  is the modified Bessel function of the first kind of order

0. For  $|z| > 2$ , we use

$$K_0(z) = \sqrt{\frac{\pi}{2z}} e^{-z} \left[ 1 - \frac{1}{8z} + \frac{9}{2} \frac{1}{(8z)^2} - \frac{75}{2} \frac{1}{(8z)^3} + \frac{600}{(8z)^4} + \dots \right].$$

[14]

To calculate the scattered intensity, we insert the correlation function (Eq. 9) together with the appropriate form factor (Eq. 8) into the scattering cross-section (Eq. 3). The sensitivity to the parameters of the model is illustrated in Fig. 1.

**Scattering by the ripple phase.** To test the effect of possible static height-fluctuations, we calculate the scattering by ripples schematized in Fig. 9 Inset. The Fourier expansion is

$$z(x) = \sum_{p=1}^{\infty} a_{2p+1} \sin \left[ \frac{2\pi(2p+1)x}{\Lambda} \right],$$

[15]

with

$$a_{2p+1} = \frac{2\Lambda^2}{(2p+1)^2\pi^2\Lambda_1(\Lambda-\Lambda_1)} \sin \left[ (2p+1)\pi \left( 1 - \frac{\Lambda_1}{\Lambda} \right) \right]. \quad [16]$$

Here,  $x$  is a one-dimensional coordinate, and we obtain the height:height correlation function as a two-dimensional average over randomly oriented domains (powder diffraction diagram):

$$\langle z(0)z(r_{\parallel}) \rangle = \frac{1}{2} \sum_{p=1}^{\infty} a_{2p+1}^2 J_0 \left[ \frac{2\pi(2p+1)r_{\parallel}}{\Lambda} \right], \quad [17]$$

where  $J_0$  is the Bessel function of the first kind of order 0. Inserting this correlation function in Eq. 3, we can estimate the scattering by a ripple phase.

Although we do not know of publications reporting ripple phase in pure di-C<sub>18</sub>-PC [DSPC], we can take order-of-magnitudes on related systems: di-C<sub>14</sub>-PC [DMPC] (2), di-C<sub>16</sub>-PC [DPPC] (3) and DSPC-DMPC mixtures (4). Typical values correspond to a wavelength  $\Lambda$  in the range of ( $\sim 10^{-9}$ – $10^{-7}$ ) m and an amplitude of the order of 0.5–10 nm. Fig. 9 demonstrates that, on such examples, in this wavelength range our experiment has a sensitive detection level as low as (0.1–0.2 nm) in amplitude. A smoother undulation shape, resulting in a higher and narrower peak in Fourier space, would have been even easier to detect. To summarize, unless it had a very small wavelength (of order of  $10^{-9}$  m, or less) (5), a static undulation like a ripple phase would certainly have been detected.

1. Abramovitz, M. & Stegun, I. (1965) Handbook of mathematical functions (Dover, New York).
2. Woodward, J.T. & Zasadzinski, J.A. (1997) *Biophys. J.* **72**, 964-976.
3. Fang, Y. & Yang, J. (1996) *J. Phys. Chem.* **100**, 15614-15619.
4. Leidy, C., Kaasgaard, T., Crowe, J.H., Mouritsen, O. & Jorgensen, K. (2002) *Biophys. J.* **83**, 2625-2633.
5. Cunningham, B.A., Brown, A.D., Wolfe, D.H., Williams, W.P. & Brain, A. (1998) *Phys. Rev. E* **48**, 3662-3672.
