# Supplementary material
Source: PubMed Central journal article supplement (PMC1187988)

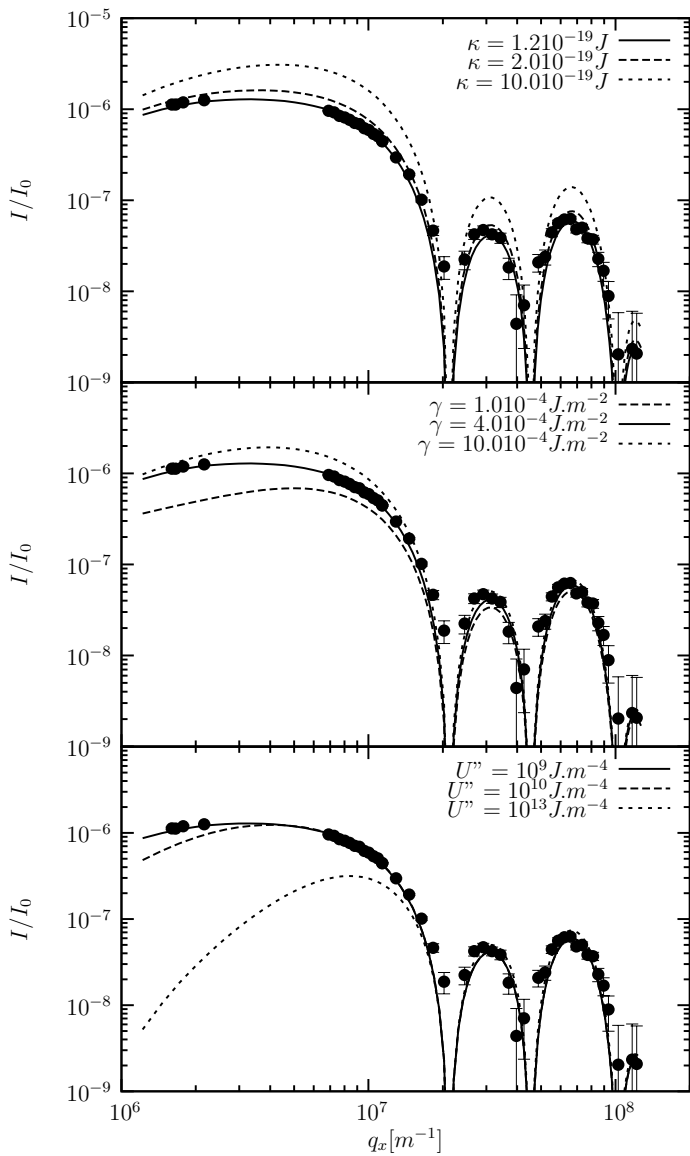

Supplement: pnas_0504588102_1.pdf [file pnas_0504588102_1.pdf]

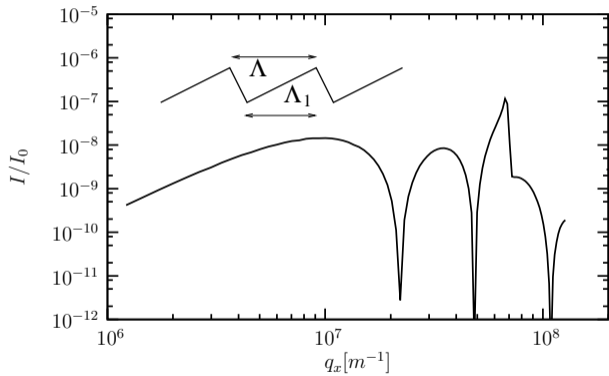

Supplement: pnas_0504588102_2.pdf [file pnas_0504588102_2.pdf]
